1 **Transcriptomic, protein-DNA interaction, and metabolomic studies of VosA, VelB,**  
2 **and WetA in *Aspergillus nidulans* asexual spores**

3

4 Ming-Yueh Wu<sup>at\*</sup>, Matthew E. Mead<sup>bt†</sup>, Mi-Kyung Lee<sup>c</sup>, George F. Neuhaus<sup>d</sup>, Donovan A.  
5 Adpressa<sup>d</sup>, Julia I. Martien<sup>a,e</sup>, Ye-Eun Son<sup>f</sup>, Heungyun Moon<sup>a</sup>, Daniel Amador-Noguez<sup>a,g</sup>,  
6 Kap-Hoon Han<sup>h</sup>, Antonis Rokas<sup>b</sup>, Sandra Loesgen<sup>d,e</sup>, Jae-Hyuk Yu<sup>a,i</sup>, Hee-Soo Park<sup>f,i,#</sup>

7

8 <sup>a</sup> Department of Bacteriology, University of Wisconsin, Madison, WI, USA

9 <sup>b</sup> Department of Biological Sciences, Vanderbilt University, Nashville, Tennessee, USA

10 <sup>c</sup> Biological Resource Center (BRC), Korea Research Institute of Bioscience and  
11 Biotechnology (KRIBB), Jeongeup-si, Republic of Korea

12 <sup>d</sup> Department of Chemistry, Oregon State University, Corvallis, Oregon, USA

13 <sup>e</sup> The Whitney Laboratory for Marine Bioscience, University of Florida, Gainesville, Florida,  
14 USA

15 <sup>f</sup> School of Food Science and Biotechnology, Kyungpook National University, Daegu,  
16 Republic of Korea

17 <sup>g</sup> DOE Great Lakes Bioenergy Research Center, University of Wisconsin, Madison,  
18 Wisconsin, USA

19 <sup>h</sup> Department of Pharmaceutical Engineering, Woosuk University, Wanju, Republic of Korea

20 <sup>i</sup> Department of Systems Biotechnology, Konkuk University, Seoul, Republic of Korea

21

22 **Running Head:** Inter-dependent regulatory roles of VosA, VelB, and WetA in fungal spores

23

24 **#Address correspondence to** Hee-Soo Park, [phsoo97@knu.ac.kr](mailto:phsoo97@knu.ac.kr)

25 School of Food Science and Biotechnology, Kyungpook National University, 80 Daehak-ro,  
26 Buk-gu, Daegu, 41566, Republic of Korea

27 <sup>†</sup> M.-Y.W. and M.E.M. contributed equally to this article.

28 <sup>\*</sup>Present address: Ming-Yueh Wu, Ginkgo Bioworks Inc., Boston, Massachusetts, USA.

29 **Keywords:** Sporulation, Asexual development, velvet, WetA, secondary metabolites,  
30 *Aspergillus*, transcription factor, genetic regulatory network

31 **Abstract**

32 In filamentous fungi, asexual development involves morphological differentiation and  
33 metabolic changes leading to the formation of asexual spores. The process of asexual  
34 spore formation in *Aspergillus* is precisely regulated by multiple transcription factors (TFs),  
35 including VosA, VelB, and WetA, and these three TFs are key regulators of the formation  
36 and maturation of asexual spores (conidia) in *Aspergillus* including the model fungus  
37 *Aspergillus nidulans*. To gain a mechanistic insight on the complex regulatory roles of these  
38 TFs in asexual spores, we conducted genome-wide studies on the expression, protein-DNA  
39 interactions, and primary and secondary metabolism employing *A. nidulans* conidia. RNA  
40 sequencing and chromatin immunoprecipitation-sequencing data have revealed that the  
41 three TFs directly or indirectly regulate the expression of genes associated with spore-wall  
42 formation/integrity, asexual development, and secondary metabolism. In addition,  
43 metabolomics analyses of wild-type and mutant conidia indicate that these three TFs  
44 regulate a diverse array of primary and secondary metabolism. In summary, WetA, VosA,  
45 and VelB play inter-dependent and distinct roles governing morphological development and  
46 primary/secondary metabolic remodeling in *Aspergillus* conidia.

47

## 48 **Importance**

49 Filamentous fungi produce a vast number of asexual spores that act as reproductive and  
50 propagator cells. These spores affect humans, due to the infectious or allergenic nature of  
51 the propagule. *Aspergillus* species produce asexual spores called conidia and their  
52 formation involves morphological development and metabolic changes, and the associated  
53 regulatory systems are coordinated by spore-specific transcription factors. To understand  
54 the underlying global regulatory programs and cellular outcomes associated with conidia  
55 formation, functional genomic and metabolomic analyses were performed in the model  
56 fungus *Aspergillus nidulans*. Our results show that the fungus specific WetA/VosA/VelB  
57 transcription factors govern the coordination of morphological and chemical developments  
58 during sporogenesis. The results of this study provide insights into the genetic regulatory  
59 networks about how morphological developments and metabolic changes are coordinated  
60 in fungi. The findings are relevant for other *Aspergillus* species such as the major human  
61 pathogen *Aspergillus fumigatus* and the aflatoxin-producer *Aspergillus flavus*.

## 62 **Introduction**

63 Fungal asexual spores (conidia) are key reproductive cells that are essential to the long-  
64 term survival of filamentous fungi under a variety of environmental conditions (1). Conidia  
65 can easily disperse into various environmental niches and act as infectious units for some  
66 pathogenic fungi (2-4). Asexual spore formation (conidiogenesis) involves developmental  
67 and metabolic changes in the organism and the associated regulatory systems are  
68 precisely coordinated (5, 6). Current knowledge about conidiogenesis is derived from  
69 numerous studies of model filamentous fungi such as *Aspergillus nidulans* (7-10).

70 The entire process of conidiogenesis is regulated by distinct gene sets, including central,  
71 upstream, and feedback regulators (6, 11). These components are highly conserved in  
72 *Aspergillus* species (12). In order to initiate conidiation, upstream developmental activators  
73 (FluG and FlbA-E) induce mRNA expression of *brlA*, a key initiator of conidiogenesis (13);  
74 whereas, several negative regulators such as SfgA and NsdD repress when the fungal  
75 hyphae acquire developmental competence (14-16). After the initiation of conidiogenesis,  
76 BrlA, AbaA, and WetA sequentially control the conidiation-specific genetic regulatory  
77 network, thereby regulating the formation of asexual specialized structures called  
78 conidiophores, which consist of aerial stalks, vesicles, metulae, phialides, and conidia (9,  
79 17). These regulators are considered to form the central regulatory pathway  
80 (BrlA→AbaA→WetA) in *Aspergillus* species (18). BrlA is a key transcription factor which  
81 activates the expression of *abaA* and other genes in the early stage of conidiation (19, 20).  
82 AbaA is a TEF1 (transcriptional enhancer factor-1) family transcription factor governing the  
83 expression of certain genes such as *wetA*, *vosA*, *veiB*, and *rodA* in the metulae and  
84 phialides (21-23). WetA plays an important role in conidial wall integrity and conidial  
85 maturation during the late phase of conidiogenesis (24, 25). Our recent studies have shown

86 that WetA functions as a DNA-binding protein that regulates spore-specific gene expression  
87 (25, 26). Along with WetA, two velvet regulators, VosA and VelB, which are fungus-specific  
88 transcription factors, coordinate morphological, structural, and chemical developments, as  
89 well as exert feedback control of BrIA in conidia (27-30).

90 Previous studies have found that single knockout mutants of *vosA*, *velB*, and *wetA* share  
91 multiple conidial phenotypes including reduced spore viability, impaired trehalose  
92 biosynthesis, defective cell wall integrity, and reduced stress tolerance (25, 31, 32). Results  
93 of chromatin immunoprecipitation analyses have demonstrated that VosA and WetA  
94 recognize certain DNA-sequences(s) in the promoter regions of target genes and regulate  
95 mRNA expression of spore-specific genes in asexual spores (25, 29). In addition, the  
96 deletion of *vosA* or *wetA* affects transcript expression in secondary metabolite cluster genes  
97 (25, 30, 33). Biochemical studies have determined that VosA interacts with VelB in conidia,  
98 and this complex controls trehalose and  $\beta$ -glucan biosynthesis (30, 34). Importantly, the  
99 roles of these three transcription factors are conserved in *Aspergillus* species (35-38).  
100 Considered jointly, these results suggest that VosA, VelB, and WetA are key transcription  
101 factors that orchestrate spore-specific gene expression in *A. nidulans*. Although the role of  
102 each regulator has been studied, the regulatory networks between these proteins have not,  
103 to date, been investigated in detail. In addition, the effects of these three proteins on  
104 primary and secondary metabolism are yet to be elucidated.

105 In this study, we aimed to determine the cross-regulatory mechanisms of VosA/VelB/WetA  
106 in fungal conidiation using comparative transcriptomic and metabolomic analyses of the  
107 wild-type (WT) and null mutants of *wetA*, *velB*, and *vosA* in *A. nidulans* conidia. In addition,  
108 the direct targets of these regulators were identified by combining the results from the  
109 VosA- and VelB-chromatin interactions using chromatin immunoprecipitation sequencing

110 (ChIP-seq) analysis with WetA-direct targets identified in a previous study (25). The results  
111 clarify the detailed molecular mechanisms by which VosA/VelB and WetA control defined  
112 common and distinct regulons and increase the overall understanding of the regulatory  
113 networks that govern fungal cell differentiation and metabolism.

114

## 115 **Results**

### 116 **VosA-, VelB-, and WetA-mediated gene regulation in *A. nidulans* conidia**

117 To understand the conserved and divergent regulatory roles of VosA, VelB, and WetA in *A.*  
118 *nidulans* conidia, comparative analysis of gene expression differences between the WT and  
119 null mutant conidia was carried out (**Figure 1**). The 40.98% (4503/10988), 45.61%  
120 5012/10988), and 51.96% (5729/10988) genes of the *A. nidulans* genome are differentially  
121 regulated in the  $\Delta vosA$ ,  $\Delta velB$ , and  $\Delta wetA$  mutant conidia, respectively, suggesting that the  
122 three regulators have a broad regulatory effect in conidia (**Figure S1**). A total of 2143  
123 differentially expressed genes (DEGs) between the WT and the  $\Delta vosA$ ,  $\Delta velB$ , and  $\Delta wetA$   
124 mutant conidia were identified (**Figure 1A**, fold change > 2.0 for upregulation or  
125 downregulation, and q-value < 0.05). The mRNA expression levels of 890 genes were  
126 downregulated in all three mutant conidia, compared with the WT conidia. However, in all  
127 three mutant conidia, the mRNA levels of 1253 genes were upregulated. Among them,  
128 mRNA expression of a variety of genes associated with asexual development and signal  
129 transduction was affected by these three transcription factors (**Tables S1-S2**). Importantly,  
130 748 and 769 DEGs were down- or up-regulated by both  $\Delta vosA$  and  $\Delta velB$  mutant conidia,  
131 but not  $\Delta wetA$  mutant conidia, respectively, while the mRNA levels of 2792 genes were  
132 affected solely in the *wetA* null mutant conidia. Put together, these results suggest that

133 VosA and VelB share more DEGs while the WetA regulon has many more uniquely  
134 regulated genes.

135 To further gain insight into the regulatory roles of these transcription factors, functional  
136 category analyses using Gene Ontology (GO) terms were carried out (**Figure 1B**). Results  
137 of the GO analysis demonstrated that several genes involved in the monocarboxylic acid  
138 metabolic process, oxidation-reduction process, trehalose metabolic process, and cellular  
139 carbohydrate metabolic process were downregulated in all three mutant conidia, whereas a  
140 large number of genes associated with the secondary metabolic biosynthetic process, chitin  
141 biosynthetic process, asexual sporulation resulting in formation, and (1-3)- $\beta$ -D-glucan  
142 metabolic process were upregulated in these mutant conidia. The VosA- and VelB-specific  
143 downregulated genes were enriched in functional categories that included cellular catabolic  
144 process, protein localization, and acetate catabolic process. The functional GO categories  
145 associated with the VosA- and VelB-specific upregulated genes were the secondary  
146 metabolic biosynthetic process, steroid metabolic process, and transport (**Figure S2A**).  
147 Interestingly, a large number of genes involved in the RNA metabolic process was  
148 downregulated in  $\Delta wetA$  mutant conidia but not in  $\Delta vosA$  or  $\Delta velB$  mutant conidia (**Figure**  
149 **S2B**).

#### 150 **Putative direct targets of VosA, VelB, and/or WetA in conidia**

151 Our previous studies reported that VosA contains the velvet DNA binding domain, which  
152 recognizes the VosA binding motif in certain promoter regions (29). To identify the VelB  
153 direct target genes and compare the putative direct target genes of VosA and VelB, ChIP  
154 experiments, followed by high-throughput sequencing of the enriched DNA fragments were  
155 carried out. ChIPs from strains containing FLAG epitope-tagged versions of VosA and VelB  
156 were compared to ChIPs from wild type conidia that did not contain the FLAG epitope. A

157 total of 1,734 and 655 genes that were VosA- and VelB-peak associated, respectively, were  
158 identified using the same analysis pipeline as described previously (25) (**Figure 2**). To  
159 identify the VosA/VelB response elements, DNA sequences in the 100 bp surrounding each  
160 peak were subjected to Multiple Em for Motif Elicitation (MEME) analysis, which led to the  
161 predicted VosA-response-element (VoRE) and the predicted VelB-response-element (VbRE)  
162 (**Figure 2A**). Interestingly, the predicted VbRE (5'-CCXTGG-3') was quite similar to the  
163 predicted VoRE (5'-CCXXGG-3').

164 We then compared the results of the ChIP-seq and RNA-seq analyses to identify potential  
165 direct target genes of the three transcription factors (**Table S3**). There were 66 genes  
166 associated with the peaks of all three transcription factors (**Table S4**). Among them, 22  
167 genes, including *flbA*, *xgeA*, *atfB*, *tpsA*, *vadA*, *cetA*, *nopA*, and *ppsA*, were DEGs in all three  
168 null mutants (**Figure 2B**). Importantly, 532 genes were considered to be potential direct  
169 target genes for both VosA and VelB but not WetA. A total of 166 genes were upregulated in  
170 both  $\Delta vosA$  and  $\Delta velB$  mutant conidia. These genes, including *brlA*, *fadA*, *rosA*, *steA*, *steC*,  
171 and *veA*, were found primarily to be involved in asexual or sexual developmental processes.  
172 Taking these results together with the previous results (27, 34), we suggest that VosA works  
173 with VelB and the VosA-VelB complex coordinates the processes involved in conidial  
174 production and maturation in *A. nidulans*.

175

### 176 **The roles of VosA, VelB, and/or WetA in conidial wall integrity**

177 Previous studies have shown that the deletion of *vosA*, *velB*, or *wetA* alters the amount of  
178 trehalose and  $\beta$ -glucan in conidia (25, 30), suggesting that these genes play a conserved  
179 role in regulating the mRNA expression of genes associated with conidial integrity. High-



180 performance liquid chromatography (HPLC) analysis demonstrated that the trehalose  
181 contents of the three null mutant conidia were dramatically decreased (**Figure 3A**). In  
182 addition, the mRNA expression of most genes involved in trehalose biosynthesis was  
183 downregulated (**Figure 3B & Table S5**). Moreover, most genes associated with chitin and  
184  $\beta$ -(1,3)-glucan biosynthesis were upregulated in the  $\Delta vosA$ ,  $\Delta veIB$ , and  $\Delta wetA$  mutant  
185 conidia (**Figure 3C and 3D**). These results suggest that VosA, VelB, and WetA govern the  
186 mRNA expression of genes associated with conidial wall integrity in *A. nidulans*.

187

#### 188 **Alterations to primary metabolites in $\Delta vosA$ , $\Delta veIB$ , and $\Delta wetA$ conidia**

189 As mentioned above, the deletion of *vosA*, *veIB*, or *wetA* led to alterations in the mRNA  
190 expression of genes involved in metabolic processes (glycerol metabolic process, ketone  
191 metabolic process, and amino sugar metabolic process) and amino acid metabolism (**Table**  
192 **S6**), implying that the amounts of primary metabolites may be affected by the absence of  
193 *vosA*, *veIB*, or *wetA* in conidia. To test this hypothesis, the abundances of several primary  
194 metabolites involved in the tricarboxylic acid (TCA) cycle and amino acid biosynthesis were  
195 examined in WT and mutant conidia (**Figure 4**). The abundances of pyruvate,  $\alpha$ -  
196 ketoglutarate, and malate were increased in the conidia of the three null mutants. Acetyl-  
197 CoA and succinate were decreased in both  $\Delta vosA$  and  $\Delta veIB$ , but not  $\Delta wetA$ , mutant  
198 conidia. The amounts of lactate in both  $\Delta vosA$  and  $\Delta veIB$  mutant conidia were significantly  
199 high, compared with the WT conidia.

200 The abundance of 13 amino acids (alanine, isoleucine, methionine, leucine, phenylalanine,  
201 tryptophan, valine, threonine, serine, asparagine, glutamine, aspartate, and glutamate) was  
202 affected in at least one null mutant. Moreover, levels of nine amino acids were high in all

203 three mutant conidia. The effects of deleting *vosA/velB* or *wetA* on the abundance of  
204 glutamate, glutamine, aspartate, and asparagine differed. Deletion of *wetA* caused  
205 decreased levels of glutamate, glutamine, and asparagine in conidia, whereas, levels of  
206 these amino acids were increased or not affected by the absence of *vosA* or *velB*. The  
207 genes involved in the biosynthesis of these amino acids and primary metabolites were  
208 differentially regulated in the three null mutants. Overall, these results suggest that the  
209 regulatory networks of primary metabolites and amino acids are diverse in the three null  
210 mutants.

211

### 212 **The abundance of secondary metabolites in $\Delta vosA$ , $\Delta velB$ , and $\Delta wetA$ conidia**

213 Previous studies found that these three transcription factors are important for production of  
214 several secondary metabolites in *Aspergillus* species (33, 35, 39). In addition, according to  
215 the GO analysis results, deletion of *vosA*, *velB*, or *wetA* results in alteration of mRNA  
216 expression of biosynthetic gene clusters involved in the production of multiple secondary  
217 metabolites, including monodictyphenone, sterigmatocystin and asperfuranone (**Figures 1**  
218 **and S2; see also Table S7**). To elucidate the conserved and divergent regulatory effects of  
219 secondary metabolism in the three conidia mutants, the secondary metabolites were  
220 extracted and subjected to liquid chromatography-mass spectrometric (LC/MS) analysis. A  
221 principal component analysis showed differences between the four different conidia  
222 samples (**Figure S3**). The secondary metabolite content of the WT conidia was relatively  
223 similar to that of the  $\Delta wetA$  conidia, indicating similar abundances and types of secondary  
224 metabolites. Conidia from the  $\Delta vosA$  and  $\Delta velB$  mutants clustered far apart, which  
225 suggested that a unique set of secondary metabolites or different levels of metabolites were  
226 expressed and extracted. This is interesting considering the two TFs can interact and their

227 binding motifs and regulated gene lists were so similar to one another (**Figures 1A and 2A**).

228 Next, we applied analysis of variance to identify the most different molecular entities  
229 detected as mass/charge ( $m/z$ ) value and retention time (RT) pairs in the LC/MS analysis-  
230 derived metabolomics data. As shown in **Figure 5**, the abundance of several secondary  
231 metabolites was different in the positive or negative ionization modes. For example, the  
232 abundance of arugosin A was high in the  $\Delta wetA$  conidia, compared with the WT conidia, but  
233 not in the  $\Delta vosA$  and  $\Delta ve/B$  mutant conidia.

234 To further dissect the roles of VosA, VelB, and WetA in secondary metabolism, we focused  
235 on some known secondary metabolites including sterigmatocystin, emericellamide, and  
236 austinol (**Figure 6**). Sterigmatocystin is a precursor of aflatoxins and its biosynthetic gene  
237 cluster and intermediates have previously been studied (40, 41). The amount of  
238 sterigmatocystin in the  $\Delta ve/B$  conidia was significantly decreased compared with that in the  
239 WT conidia, but the  $\Delta vosA$  and  $\Delta wetA$  conidia contained similar amounts of  
240 sterigmatocystin (**Figure 6A**). However, the amounts of sterigmatocystin intermediates were  
241 different in  $\Delta vosA$  and  $\Delta wetA$  conidia. Levels of norsolorinic acid and nidurufin were low in  
242 the  $\Delta ve/B$  and  $\Delta wetA$  conidia, while the amount of versiconol was high only in the  $\Delta ve/B$   
243 conidia. The RNA-seq results indicated that the mRNA levels of almost all of the genes in  
244 the sterigmatocystin gene cluster were increased in both the  $\Delta vosA$  and  $\Delta wetA$  conidia,  
245 whereas the mRNA expression of these genes in the  $\Delta ve/B$  conidia was less consistent. In  
246 particular, the mRNA levels of *stcL*, *stcN*, *stcQ*, *stcS*, *stcT*, *stcU*, *stcV*, and *stcW* were  
247 decreased in the  $\Delta ve/B$  conidia, compared with the WT conidia. These results suggest that  
248 VosA and VelB play diverse roles in the regulation of sterigmatocystin biosynthesis.

249 Emericellamide compounds are cyclopeptides that are produced by several *Aspergillus*  
250 species (42, 43). The abundance of these compounds, relative to WT production, was high

251 in  $\Delta vosA$  and  $\Delta velB$  conidia and mRNA levels of *easA-D* were also high in both mutant  
252 conidia, implying that VosA and VelB repress emericellamide biosynthesis in WT conidia  
253 **(Figure 6B)**. In the  $\Delta wetA$  conidia, however, mRNA expression of the emericellamide gene  
254 cluster was increased, but the quantity of emericellamide compounds did not increase,  
255 suggesting that the regulatory mechanism of emericellamide biosynthesis in the  $\Delta wetA$   
256 conidia is more complex compared to the influence of  $\Delta vosA$  and  $\Delta velB$  in emericellamide  
257 production in conidia. In the three types of null mutant conidia, the abundance of two fungal  
258 meroterpenoids, austinol and dehydroaustinol (44), was decreased, compared with the WT  
259 conidia **(Figure 6C)**. Furthermore, the expression of several austinol cluster genes was  
260 decreased in the  $\Delta velB$  and  $\Delta wetA$  conidia. Taken together, these results demonstrate that  
261 the ways in which VosA, VelB, and WetA govern the expression of secondary metabolite  
262 gene clusters, and the production of their associated metabolites, in *A. nidulans* conidia are  
263 divergent from one another.

264

## 265 Discussion

266 Asexual developmental processes in filamentous fungi are regulated by a variety of  
267 transcription factors (6). These transcription factors orchestrate the spatial and temporal  
268 transcriptional expression of development-specific genes, leading to physiological and  
269 metabolic changes. During the processes of conidia formation from phialides and conidial  
270 maturation, conidial-specific transcription factors including VosA, VelB, and WetA regulate  
271 spore specific gene expression patterns and metabolic changes (25, 30). In this study, we  
272 investigated the transcript and metabolite changes that are regulated by VosA, VelB and  
273 WetA in *A. nidulans* conidia.

274 Transcriptomic analyses indicated that about 20% of the *A. nidulans* genome (2143 genes)  
275 is differentially expressed in  $\Delta vosA$ ,  $\Delta velB$ , and  $\Delta wetA$  mutant conidia. ChIP-seq results  
276 identified 66 direct target genes are shared between VosA, VelB, and WetA in conidia.  
277 These results offered some explanation of how these transcription factors control  
278 phenotypic changes in conidia. First, the deletion of *vosA*, *velB*, or *wetA* caused increased  
279 mRNA expression of certain development-specific genes including *abaA*, *briA*, *flbA*, *flbC*,  
280 *nsdC*, *nosA*, and *mpkB*, which are involved in formation of asexual and sexual structures  
281 during the early and middle stages of conidia formation, but decreased transcript  
282 accumulation of spore-specific genes such as *vadA*, *catA*, *wA*, *conF*, *conJ*, *cetA*, *cetJ*, and  
283 *cetL*, which are important for conidial germination, morphogenesis, and dormancy. Another  
284 important phenotype of the  $\Delta vosA$ ,  $\Delta velB$ , and  $\Delta wetA$  mutant conidia was the differences in  
285 conidial wall integrity and the components of the conidial wall (25, 30). As shown **Figure 3**,  
286 most of the genes involved in chitin and  $\beta$ -glucan biosynthesis were upregulated in all three  
287 mutant conidia. Dynamic expression of these genes is required mainly for the remodeling of  
288 the cell wall during isotropic growth and mobilization of energy for differentiation (45), but is  
289 not required in dormant conidia. However, by altering the mRNA expression of these genes  
290 in the mutant conidia, the dormancy of conidia could be broken, affecting long-term viability,  
291 as well as conidial germination.

292 Another feature of fungal spores is their ability to resist various environmental stresses (1).  
293 However,  $\Delta vosA$ ,  $\Delta velB$ , and  $\Delta wetA$  mutant conidia are more sensitive to several  
294 environmental stresses (25, 34). It is speculated that this is regulated through alterations to  
295 the expression of genes involved in environmental stress tolerance. The data we show here  
296 support this hypothesis. First, these regulators govern the mRNA expression of genes  
297 involved in the trehalose biosynthetic pathway, thereby affecting the amount of conidial  
298 trehalose, a key component in stress protection and fungal virulence (46). Second, VosA,

299 VelB, and WetA directly or indirectly regulate genes previously associated with stress  
300 responses. CatA is a spore-specific catalase and, compared with WT spores, *catA* deletion  
301 mutant spores are sensitive to oxidative stress (47). AtfB is a bZIP transcription factor (48)  
302 and the AtfB homolog is crucial to the stress response in *A. oryzae* conidia (49). These two  
303 genes are putative direct target genes of the three regulators reported in this study, and the  
304 mRNA of *catA* and *atfB* can be positively regulated by VosA, VelB, and WetA in conidia  
305 **(Figure 2 and Table S3)**. Along with these genes, the mRNA levels of *hogA*, a key  
306 component for osmotic stress signaling (50), was downregulated in all mutant conidia.  
307 These results contribute to our understanding of the ways in which these three regulators  
308 influence the environmental stress response in conidia.

309 VosA, VelB, and WetA are key functional regulators in the formation of conidia and control  
310 spore-specific gene expression. However, our data has shown that their gene regulation  
311 networks are slightly different. RNA-seq results found that VosA and VelB co-regulate the  
312 expression of spore-specific genes. Importantly, the predicted VbRE is quite similar to the  
313 predicted VoRE **(Figure 2A)**. In addition, biochemical results from previous studies (27, 34)  
314 suggested that VosA and VelB form a hetero-complex in asexual spores. However, WetA is  
315 not directly related to VosA and VelB. WetA's putative binding site is different than the  
316 VosA/VelB binding site. Moreover, The WetA peak associated genes and the VosA/VelB  
317 peak associated genes did not overlap much. These results imply that WetA-mediated gene  
318 regulation may be different to the VosA or VelB-mediated gene regulatory network.

319 During the asexual development of *A. nidulans*, the abundance of amino acids other than  
320 phenylalanine changes and the expression of genes related to amino acid biosynthesis is  
321 altered (51). Overall, our analyses confirmed that the amount of most amino acids, and the  
322 expression of related genes, increased in all mutant spores. In addition, the abundance of

323 metabolites involved in the TCA cycle increased in all mutant conidia. However, the  
324 abundance of some primary metabolites such as glutamate, glutamic acid, lactate, and  
325 acetyl-CoA was decreased in the  $\Delta wetA$  conidia (**Figure 4**). It is not yet clear how these  
326 metabolic changes affect spore production and maturation, and further studies will be  
327 needed to understand this.

328 An important finding in this study are the mechanisms by which VosA, VelB, and WetA  
329 regulate the production of secondary metabolites, especially sterigmatocystin, in conidia.  
330 The process of sterigmatocystin production and its regulation involves 25 genes, and this  
331 metabolite is produced via steps involving several intermediate products. In  $\Delta vosA$  conidia,  
332 the mRNA expression of sterigmatocystin gene clusters was induced and the amount of  
333 sterigmatocystin produced were similar to those in the WT conidia. These results were  
334 similarly observed in sexual spores (33). While the  $\Delta vosA$  conidia contained  
335 sterigmatocystin, the metabolite was not detected in  $\Delta velB$  conidia. We reported that the  
336 VosA-VelB complex is a functional unit in conidia, but this particular result indicates that  
337 VosA and VelB play different roles in sterigmatocystin production. It is possible that VelB  
338 forms another complex, such as the VelB-VeA-LaeA complex(39), to participate in  
339 sterigmatocystin production in conidia. In the  $\Delta velB$  conidia, another important finding was  
340 that the mRNA expression of genes including *stcB*, *stcC*, *stcF*, and *stcI*, which are  
341 associated with the early stages of sterigmatocystin biosynthesis, was increased, and the  
342 amount of versiconol, a putative sterigmatocystin/aflatoxin intermediate, was also increased,  
343 in comparison with the wild type. However, mRNA levels of genes associated with the late  
344 phase of sterigmatocystin biosynthesis such as including *stcL*, *stcN*, *stcQ*, and *stcT* were  
345 decreased in  $\Delta velB$  conidia. It might be possible that VelB (or VelB/VeA/LaeA) can regulate  
346 some expression of sterigmatocystin gene clusters by epigenetic means rather than through  
347 the canonical method of *afIR* expression or activity.

348 In conclusion, this study provides a systematic dissection of the gene regulatory network  
349 and molecular mechanisms of VosA, VelB, and WetA (**Figure 7**). In conidia, VosA, VelB,  
350 and WetA directly or indirectly control the expression of spore-specific or development-  
351 specific genes, thereby altering conidia-wall integrity and conidial viability. In addition, these  
352 transcription factors regulate multiple secondary metabolite gene clusters, thus inducing  
353 secondary metabolic changes. These results provide an advance in the knowledge of  
354 conidial formation and will provide the basis for future insights into spore formation in other  
355 filamentous fungi.

356

357

## 358 **Materials and methods**

### 359 **Strains, media, and culture conditions**

360 The fungal strains used in this study are listed in **Table 1**. Fungal strains were grown on  
361 solid or liquid minimal media with 1% glucose (MMG) and appropriate supplements for  
362 general purposes as previously described (52). For conidium samples, WT and mutant  
363 conidia were inoculated onto solid MMG plates and incubated for 48 h. Then, conidia were  
364 collected from plates using Miracloth (Calbiochem, San Diego, CA, USA) and stored at  
365  $-80^{\circ}\text{C}$ .

### 366 **RNA sequencing (RNA-seq) analysis**

367 To isolate total RNA for RNA-seq analysis, total RNA from WT and mutant conidia was  
368 extracted using Trizol Reagent (Invitrogen, USA), according to the manufacturer's  
369 instructions with modifications. To remove DNA contamination from the RNA samples,



370 DNase I (Promega, USA) was added and then RNA was purified using an RNeasy Mini kit  
371 (Qiagen, USA). Three technical replicates of each sample were analyzed. RNA sequencing  
372 was performed as previously described (33). RNA samples were submitted to the University  
373 of Wisconsin Gene Expression Center (Madison, WI, USA) for library preparation and  
374 sequencing. A strand-specific library was prepared using an Illumina TruSeq strand-specific  
375 RNA sample preparation system. The libraries of all the replicates were sequenced using  
376 an Illumina HiSeq 2500 system.

377 Data analysis of the  $\Delta vosA$  and  $\Delta veIB$  RNA-seq experiments used the same analysis  
378 pipeline as previously described for the  $\Delta wetA$  RNA-seq analysis (25). Reads were mapped  
379 to the *A. nidulans* FGSC4 transcriptome using Tophat2 version 2.1.1 (53) and the  
380 parameter “--max-intron-length 4000”. On average, 19.9 million reads per sample mapped  
381 to the genome, and the number of reads aligning to each gene was counted with HTseq-  
382 Count version 0.9.1 (54). DESeq version 1.14.1 (55) was used to determine significantly  
383 differentially expressed genes, and genes were considered regulated if they exhibited an  
384 adjusted p-value less than 0.05 and either a log<sub>2</sub> fold-change greater than one or less than  
385 negative one.

### 386 **Chromatin immunoprecipitation sequencing (ChIP-seq) analysis**

387 Samples for ChIP-seq analysis were prepared following methods described previously (29,  
388 30). DNA samples from each strain were extracted using a MAGnify Chromatin Immuno-  
389 precipitation System (Invitrogen, USA) according to the manufacturer’s protocol with a  
390 modification. Two-day-old conidia from the WT strain, strains containing VosA-FLAG, or  
391 VeIB-FLAG were cross-linked, washed, homogenized with a Mini-Beadbeater 16 (Biospec,  
392 USA), sonicated, and separated with centrifugation. The chromatin extracts were incubated  
393 with an anti-FLAG antibody-Dynabead complex. Then, samples were eluted from the beads

394 at 55°C using Proteinase K. Enriched DNA was purified using DNA Purification Magnetic  
395 Beads. DNA samples from each strain were submitted to the University of Wisconsin Gene  
396 Expression Center (Madison, WI). Libraries were prepared using a TruSeq ChIP library  
397 preparation kit (Illumina, CA). The libraries of all the replicates were sequenced using an  
398 Illumina HiSeq 2500 system.

399 Raw reads were trimmed using Trimmomatic version 0.36 (56) and the parameters  
400 “ILLUMINACLIP:2:30:10 LEADING:3 TRAILING:3 SLIDINGWINDOW:4:15 MINLEN:36”.  
401 Trimmed reads were mapped to the *A. nidulans* A4 genome using version 0.7.15 of BWA-  
402 MEM (57) and shorter split hits were marked as secondary alignments. Mapped reads with  
403 MAPQ values less than 1, as well as unmapped, secondarily aligned, supplementary, and  
404 duplicated reads, were discarded with SAMtools version 1.6 (58). On average, 2.3 million  
405 and 7.2 million reads per sample were used for peak calling in the VosA and VelB  
406 experiments, respectively. Mapped reads that survived our filter were pooled and extension  
407 sizes were estimated with version 1.15.2 of SPP (59, 60). Peaks were called with MACS2  
408 (61) version 2.1.2 using the extension sizes estimated by SPP, a genome size of 2.93e7,  
409 and the “--nomodel” parameter. Peaks with a fold-change greater than 2.0 and a q-value  
410 less than 0.001 were further analyzed. Peak lists were combined from both of the VosA  
411 biological replicates, as >99% of the peaks from the first replicate were found in the second  
412 replicate. Motifs were identified in the 100 bp of sequences surrounding each peak summit  
413 using MEME-ChIP (62). Motifs that occurred zero or once in the sequences around the  
414 peaks and were 4–21 nts in length were further analyzed.

#### 415 **Functional enrichment analysis**

416 Enriched terms from the “GO Biological Process”, “KEGG”, “InterPro”, and “Pfam”  
417 databases were identified using the tools available at AspGD (63), FungiDB (64), and

418 ShinyGO v0.60 (65). Unless otherwise stated, default settings were used in ShinyGO v0.60.  
419 The settings were as follows: Database: *Emericella nidulans* STRINGdb, P-value cutoff  
420 (FDR): 0.05, # of most significant terms to show: 30.

#### 421 **Primary metabolite analysis**

422 WT,  $\Delta wetA$ ,  $\Delta vosA$ , and  $\Delta veIB$  mutant conidia were inoculated onto solid MMG plates and  
423 incubated for 48 h, and then fresh conidia were harvested using Miracloth with HPLC-grade  
424 water. For each sample,  $2 \times 10^8$  conidia were mixed with 500  $\mu$ l HPLC-grade  
425 acetonitrile:methanol:water (40:40:20, v/v) and 300  $\mu$ l beads, homogenized by the Mini  
426 Bead beater, and centrifuged. The supernatant was filtered using a 0.45  $\mu$ m PTFE Mini-  
427 UniPrep filter vial (Agilent) and collected and immediately snap frozen with liquid nitrogen.  
428 The samples were stored at  $-80^\circ\text{C}$  until primary metabolite analysis.

429 The samples were then analyzed as described previously (66, 67). Samples were analyzed  
430 using an HPLC-MS system consisting of a Dionex UHPLC coupled by electrospray  
431 ionization (ESI; negative mode) to a hybrid quadrupole-high-resolution mass spectrometer  
432 (Q Exactive orbitrap, Thermo Scientific) operated in full scan mode. Metabolite peaks were  
433 identified by their exact mass and matching retention times to those of pure standards  
434 (Sigma-Aldrich).

#### 435 **Secondary metabolite analysis**

436 The conidia of WT,  $\Delta wetA$ ,  $\Delta vosA$ , and  $\Delta veIB$  mutant strains were extracted by adding 1.5  
437 ml of a methanol/acetonitrile (2:1) mixture followed by sonication for 60 min. The  
438 suspension was then left overnight before centrifugation at 14,000 rpm for 15 mins. The  
439 supernatant (1 ml) was removed, filtered, and evaporated to dryness *in vacuo*. Extracts for  
440 the metabolomics analysis were normalized to 10 mg/ml in methanol for LC/MS analysis.

441 Analytical HPLC was performed using an Agilent 1100 HPLC system equipped with a  
442 photodiode array detector. The mobile phase consisted of ultra-pure water (A) and  
443 acetonitrile (B) with 0.05% formic acid in each solvent. A gradient method from 10% B to  
444 100% B in 35 min at a flow rate of 0.8 ml/min was used. The column (Phenomenex Kinetex  
445 C18, 5  $\mu\text{m}$   $\times$  150 mm  $\times$  4.6 mm) was re-equilibrated before each injection and the column  
446 compartment was maintained at 30°C throughout each run. All samples were filtered  
447 through a 0.45  $\mu\text{m}$  nylon filter before LC/MS analysis.

448 Extracts from the WT and mutant conidia were analyzed in duplicate on an Agilent 1100  
449 series LC/MS platform (68, 69). Negative mode ionization was found to detect most  
450 metabolites. The first 5 min of every run was removed due to a large amount of co-eluting,  
451 low molecular weight, polar metabolites. Data sets were exported from Agilent's  
452 Chemstation software as .netCDF files and imported into MZmine 2.38 (70). Peak picking  
453 was performed with established protocols (71) resulting in 123 marker ions. Briefly, mass  
454 detection was centroid with a 5E2 minimum height. Chromatogram building was limited to  
455 peaks greater than 0.1 min with 0.05 m/z tolerance and 1E3 minimum height. Data  
456 smoothing was performed at a filter width of five. Chromatogram deconvolution utilized a  
457 local minimum search with a chromatographic threshold of 95%, minimum relative height of  
458 10%, minimum absolute height of 3E3, minimum ratio of peak to edge of 1, and peak  
459 duration range of 0.1–5.0 min. The data was deisotoped with a 1 ppm m/z tolerance before  
460 all treatments were aligned and duplicate peaks combined with a tolerance of 0.1 m/z and  
461 3.0 min RT. Peak finder gap filling was performed with 50% intensity tolerance and 0.1 m/z  
462 tolerance. Peak lists were exported to Metaboanalyst (72), where missing values were  
463 replaced with half the minimum positive value, data were filtered by interquartile range, and  
464 log transformation of the data was employed.

465 **Data availability**

466 All RNA-seq and ChIP-seq data files are available from the NCBI Gene Expression  
467 Omnibus database (*wetA* RNA-seq, GSE114143; *vosA* and *ve/B* RNA-seq, GSE154639;  
468 *WetA* ChIP-seq, GSE114141; *VosA* and *VelB* ChIP-seq, GSE154630).

469 **Acknowledgments**

470 The work at UW-Madison was supported by the National Institute of Food and Agriculture,  
471 United States Department of Agriculture, Hatch project 1009695 (MYW and HM), and by the  
472 University of Wisconsin-Madison Office of the Vice Chancellor for Research and Graduate  
473 Education (OVCRGE) with funding from the Wisconsin Alumni Research Foundation to JHY.

474 The work by KHH was supported by the Intelligent Synthetic Biology Center of Global  
475 Frontier Projects (2015M3A6A8065838) and by Basic Science Research Program through  
476 NRF (NRF-2017R1D1A3B06035312) funded by the Korean government.

477 The work by HSP was supported by the National Research Foundation of Korea (NRF)  
478 grant to HSP funded by the Korean government (NRF-2016R1C1B2010945 and NRF-  
479 2020R1C1C1004473).

480 The work by MKL was supported by the KRIBB Research Initiative Program (KGM5232022).

481 The work by GFN, DAA, and SL was supported by the US National Science Foundation  
482 grant CH-1808717.

483 The work by AR and MEM was supported by National Science Foundation grant DEB-  
484 1442113 and a Discovery Grant from Vanderbilt University.

485

486 **References**

- 487 1. Ebbole DJ. 2010. The Conidium. Cellular and Molecular Biology of Filamentous  
488 Fungi:577-590.
- 489 2. Wyatt TT, Wosten HA, Dijksterhuis J. 2013. Fungal spores for dispersion in space  
490 and time. Adv Appl Microbiol 85:43-91.
- 491 3. Park JH, Ryu SH, Lee JY, Kim HJ, Kwak SH, Jung J, Lee J, Sung H, Kim SH. 2019.  
492 Airborne fungal spores and invasive aspergillosis in hematologic units in a tertiary  
493 hospital during construction: a prospective cohort study. Antimicrob Resist Infect  
494 Control 8:88.
- 495 4. Latge JP. 1999. *Aspergillus fumigatus* and aspergillosis. Clin Microbiol Rev 12:310-  
496 50.
- 497 5. Park H-S, Yu J-H. 2012. Genetic control of asexual sporulation in filamentous fungi.  
498 Curr Opin Microbiol 15:669-77.
- 499 6. Ojeda-Lopez M, Chen W, Eagle CE, Gutierrez G, Jia WL, Swilaiman SS, Huang Z,  
500 Park HS, Yu JH, Canovas D, Dyer PS. 2018. Evolution of asexual and sexual  
501 reproduction in the aspergilli. Stud Mycol 91:37-59.
- 502 7. Casselton L, Zolan M. 2002. The art and design of genetic screens: filamentous fungi.  
503 Nat Rev Genet 3:683-97.
- 504 8. Martinelli SD. 1994. *Aspergillus nidulans* as an experimental organism. Prog Ind  
505 Microbiol 29:33-58.
- 506 9. Adams TH, Wieser JK, Yu J-H. 1998. Asexual sporulation in *Aspergillus nidulans*.  
507 Microbiol Mol Biol Rev 62:35-54.
- 508 10. Etxebeste O, Espeso EA. 2020. *Aspergillus nidulans* in the post-genomic era: a top-  
509 model filamentous fungus for the study of signaling and homeostasis mechanisms.  
510 Int Microbiol 23:5-22.
- 511 11. Park H-S, Yu J-H. 2016. Molecular Biology of Asexual Sporulation in Filamentous

- 512 Fungi. In: Hoffmeister D. (eds) Biochemistry and Molecular Biology. *In* D. H (ed),  
513 Biochemistry and Molecular Biology The Mycota (A Comprehensive Treatise on  
514 Fungi as Experimental Systems for Basic and Applied Research),. Springer, Cham.
- 515 12. de Vries RP, Riley R, Wiebenga A, Aguilar-Osorio G, Amillis S, Uchima CA, Anderluh  
516 G, Asadollahi M, Askin M, Barry K, Battaglia E, Bayram O, Benocci T, Braus-  
517 Stromeier SA, Caldana C, Canovas D, Cerqueira GC, Chen FS, Chen WP, Choi C,  
518 Clum A, dos Santos RAC, Damasio ARD, Diallinas G, Emri T, Fekete E, Flipphi M,  
519 Freyberg S, Gallo A, Gournas C, Habgood R, Hainaut M, Harispe ML, Henrissat B,  
520 Hilden KS, Hope R, Hossain A, Karabika E, Karaffa L, Karanyi Z, Krasevec N, Kuo A,  
521 Kusch H, LaButti K, Lagendijk EL, Lapidus A, Levasseur A, Lindquist E, Lipzen A,  
522 Logrieco AF, et al. 2017. Comparative genomics reveals high biological diversity and  
523 specific adaptations in the industrially and medically important fungal genus  
524 *Aspergillus*. *Genome Biology* 18.
- 525 13. Etxebeste O, Garzia A, Espeso EA, Ugalde U. 2010. *Aspergillus nidulans* asexual  
526 development: making the most of cellular modules. *Trends Microbiol* 18:569-76.
- 527 14. Seo JA, Guan Y, Yu JH. 2006. FluG-dependent asexual development in *Aspergillus*  
528 *nidulans* occurs via derepression. *Genetics* 172:1535-44.
- 529 15. Lee MK, Kwon NJ, Lee IS, Jung S, Kim SC, Yu JH. 2016. Negative regulation and  
530 developmental competence in *Aspergillus*. *Sci Rep* 6:28874.
- 531 16. Lee MK, Kwon NJ, Choi JM, Lee IS, Jung S, Yu JH. 2014. NsdD is a key repressor  
532 of asexual development in *Aspergillus nidulans*. *Genetics* 197:159-73.
- 533 17. Timberlake WE. 1990. Molecular genetics of *Aspergillus* development. *Annu Rev*  
534 *Genet* 24:5-36.
- 535 18. Mirabito PM, Adams TH, Timberlake WE. 1989. Interactions of three sequentially  
536 expressed genes control temporal and spatial specificity in *Aspergillus* development.  
537 *Cell* 57:859-68.
- 538 19. Adams TH, Boylan MT, Timberlake WE. 1988. *brlA* is necessary and sufficient to  
539 direct conidiophore development in *Aspergillus nidulans*. *Cell* 54:353-62.

- 540 20. Adams TH, Deising H, Timberlake WE. 1990. *briA* requires both zinc fingers to  
541 induce development. *Mol Cell Biol* 10:1815-7.
- 542 21. Andrianopoulos A, Timberlake WE. 1991. ATTS, a new and conserved DNA binding  
543 domain. *Plant Cell* 3:747-8.
- 544 22. Andrianopoulos A, Timberlake WE. 1994. The *Aspergillus nidulans abaA* gene  
545 encodes a transcriptional activator that acts as a genetic switch to control  
546 development. *Mol Cell Biol* 14:2503-15.
- 547 23. Sewall TC, Mims CW, Timberlake WE. 1990. *abaA* controls phialide differentiation in  
548 *Aspergillus nidulans*. *Plant Cell* 2:731-9.
- 549 24. Sewall TC, Mims CW, Timberlake WE. 1990. Conidium differentiation in *Aspergillus*  
550 *nidulans* wild-type and wet-white (*wetA*) mutant strains. *Dev Biol* 138:499-508.
- 551 25. Wu MY, Mead ME, Lee MK, Ostrem Loss EM, Kim SC, Rokas A, Yu JH. 2018.  
552 Systematic Dissection of the Evolutionarily Conserved WetA Developmental  
553 Regulator across a Genus of Filamentous Fungi. *mBio* 9.
- 554 26. Marshall MA, Timberlake WE. 1991. *Aspergillus nidulans wetA* activates spore-  
555 specific gene expression. *Mol Cell Biol* 11:55-62.
- 556 27. Park HS, Ni M, Jeong KC, Kim YH, Yu JH. 2012. The role, interaction and regulation  
557 of the *velvet* regulator VelB in *Aspergillus nidulans*. *PLoS One* 7:e45935.
- 558 28. Ni M, Yu JH. 2007. A novel regulator couples sporogenesis and trehalose biogenesis  
559 in *Aspergillus nidulans*. *PLoS One* 2:e970.
- 560 29. Ahmed YL, Gerke J, Park H-S, Bayram O, Neumann P, Ni M, Dickmanns A, Kim SC,  
561 Yu J-H, Braus GH, Ficner R. 2013. The *velvet* family of fungal regulators contains a  
562 DNA-binding domain structurally similar to NF-kappaB. *PLoS Biol* 11:e1001750.
- 563 30. Park H-S, Yu YM, Lee M-K, Maeng PJ, Kim SC, Yu J-H. 2015. *Velvet*-mediated  
564 repression of beta-glucan synthesis in *Aspergillus nidulans* spores. *Sci Rep* 5:10199.
- 565 31. Park H-S, Yu J-H. 2016. Velvet Regulators in *Aspergillus* spp. *Microbiol Biotechnol*



- 566 Lett 44:409-419.
- 567 32. Bayram O, Braus GH. 2012. Coordination of secondary metabolism and  
568 development in fungi: the velvet family of regulatory proteins. FEMS Microbiol Rev  
569 36:1-24.
- 570 33. Kim MJ, Lee MK, Pham HQ, Gu MJ, Zhu B, Son SH, Hahn D, Shin JH, Yu JH, Park  
571 HS, Han KH. 2020. The velvet Regulator VosA Governs Survival and Secondary  
572 Metabolism of Sexual Spores in *Aspergillus nidulans*. Genes (Basel) 11.
- 573 34. Sarikaya Bayram O, Bayram O, Valerius O, Park H-S, Irniger S, Gerke J, Ni M, Han  
574 KH, Yu J-H, Braus GH. 2010. LaeA control of velvet family regulatory proteins for  
575 light-dependent development and fungal cell-type specificity. PLoS Genet  
576 6:e1001226.
- 577 35. Wu MY, Mead ME, Kim SC, Rokas A, Yu JH. 2017. WetA bridges cellular and  
578 chemical development in *Aspergillus flavus*. PLoS One 12:e0179571.
- 579 36. Tao L, Yu JH. 2011. AbaA and WetA govern distinct stages of *Aspergillus fumigatus*  
580 development. Microbiology 157:313-326.
- 581 37. Eom TJ, Moon H, Yu JH, Park HS. 2018. Characterization of the velvet regulators in  
582 *Aspergillus flavus*. J Microbiol 56:893-901.
- 583 38. Park HS, Bayram O, Braus GH, Kim SC, Yu JH. 2012. Characterization of the velvet  
584 regulators in *Aspergillus fumigatus*. Mol Microbiol 86:937-53.
- 585 39. Bayram O, Krappmann S, Ni M, Bok JW, Helmstaedt K, Valerius O, Braus-Stromeyer  
586 S, Kwon NJ, Keller NP, Yu JH, Braus GH. 2008. VelB/VeA/LaeA complex coordinates  
587 light signal with fungal development and secondary metabolism. Science 320:1504-6.
- 588 40. Yu J, Chang PK, Ehrlich KC, Cary JW, Bhatnagar D, Cleveland TE, Payne GA, Linz  
589 JE, Woloshuk CP, Bennett JW. 2004. Clustered pathway genes in aflatoxin  
590 biosynthesis. Appl Environ Microbiol 70:1253-62.
- 591 41. Brown DW, Yu JH, Kelkar HS, Fernandes M, Nesbitt TC, Keller NP, Adams TH,  
592 Leonard TJ. 1996. Twenty-five coregulated transcripts define a sterigmatocystin

- 593 gene cluster in *Aspergillus nidulans*. Proc Natl Acad Sci U S A 93:1418-22.
- 594 42. Chiang YM, Szewczyk E, Nayak T, Davidson AD, Sanchez JF, Lo HC, Ho WY,  
595 Simityan H, Kuo E, Praseuth A, Watanabe K, Oakley BR, Wang CC. 2008. Molecular  
596 genetic mining of the *Aspergillus* secondary metabolome: discovery of the  
597 emericellamide biosynthetic pathway. Chem Biol 15:527-32.
- 598 43. Oh DC, Kauffman CA, Jensen PR, Fenical W. 2007. Induced production of  
599 emericellamides A and B from the marine-derived fungus *Emericella* sp. in competing  
600 co-culture. J Nat Prod 70:515-20.
- 601 44. Lo HC, Entwistle R, Guo CJ, Ahuja M, Szewczyk E, Hung JH, Chiang YM, Oakley  
602 BR, Wang CC. 2012. Two separate gene clusters encode the biosynthetic pathway  
603 for the meroterpenoids austinol and dehydroaustinol in *Aspergillus nidulans*. J Am  
604 Chem Soc 134:4709-20.
- 605 45. Baltussen TJH, Zoll J, Verweij PE, Melchers WJG. 2020. Molecular Mechanisms of  
606 Conidial Germination in *Aspergillus* spp. Microbiol Mol Biol Rev 84.
- 607 46. Thammahong A, Puttikamonkul S, Perfect JR, Brennan RG, Cramer RA. 2017.  
608 Central Role of the Trehalose Biosynthesis Pathway in the Pathogenesis of Human  
609 Fungal Infections: Opportunities and Challenges for Therapeutic Development.  
610 Microbiol Mol Biol Rev 81.
- 611 47. Navarro RE, Stringer MA, Hansberg W, Timberlake WE, Aguirre J. 1996. *catA*, a new  
612 *Aspergillus nidulans* gene encoding a developmentally regulated catalase. Curr  
613 Genet 29:352-9.
- 614 48. Lara-Rojas F, Sanchez O, Kawasaki L, Aguirre J. 2011. *Aspergillus nidulans*  
615 transcription factor AtfA interacts with the MAPK SakA to regulate general stress  
616 responses, development and spore functions. Mol Microbiol 80:436-54.
- 617 49. Sakamoto K, Arima TH, Iwashita K, Yamada O, Gomi K, Akita O. 2008. *Aspergillus*  
618 *oryzae atfB* encodes a transcription factor required for stress tolerance in conidia.  
619 Fungal Genet Biol 45:922-32.

- 620 50. Han KH, Prade RA. 2002. Osmotic stress-coupled maintenance of polar growth in  
621 *Aspergillus nidulans*. Mol Microbiol 43:1065-78.
- 622 51. Bayram O, Feussner K, Dumkow M, Herrfurth C, Feussner I, Braus GH. 2016.  
623 Changes of global gene expression and secondary metabolite accumulation during  
624 light-dependent *Aspergillus nidulans* development. Fungal Genet Biol 87:30-53.
- 625 52. Kafer E. 1977. Meiotic and mitotic recombination in *Aspergillus* and its chromosomal  
626 aberrations. Adv Genet 19:33-131.
- 627 53. Kim D, Pertea G, Trapnell C, Pimentel H, Kelley R, Salzberg SL. 2013. TopHat2:  
628 accurate alignment of transcriptomes in the presence of insertions, deletions and  
629 gene fusions. Genome Biol 14:R36.
- 630 54. Anders S, Pyl PT, Huber W. 2015. HTSeq--a Python framework to work with high-  
631 throughput sequencing data. Bioinformatics 31:166-9.
- 632 55. Love MI, Huber W, Anders S. 2014. Moderated estimation of fold change and  
633 dispersion for RNA-seq data with DESeq2. Genome Biol 15:550.
- 634 56. Bolger AM, Lohse M, Usadel B. 2014. Trimmomatic: a flexible trimmer for Illumina  
635 sequence data. Bioinformatics 30:2114-20.
- 636 57. Li H. 2013. Aligning sequence reads, clone sequences and assembly contigs with  
637 BWA-MEM. arXiv 1303.3997.
- 638 58. Li H, Handsaker B, Wysoker A, Fennell T, Ruan J, Homer N, Marth G, Abecasis G,  
639 Durbin R, Genome Project Data Processing S. 2009. The Sequence Alignment/Map  
640 format and SAMtools. Bioinformatics 25:2078-9.
- 641 59. Landt SG, Marinov GK, Kundaje A, Kheradpour P, Pauli F, Batzoglou S, Bernstein  
642 BE, Bickel P, Brown JB, Cayting P, Chen Y, DeSalvo G, Epstein C, Fisher-Aylor KI,  
643 Euskirchen G, Gerstein M, Gertz J, Hartemink AJ, Hoffman MM, Iyer VR, Jung YL,  
644 Karmakar S, Kellis M, Kharchenko PV, Li Q, Liu T, Liu XS, Ma L, Milosavljevic A,  
645 Myers RM, Park PJ, Pazin MJ, Perry MD, Raha D, Reddy TE, Rozowsky J, Shores  
646 N, Sidow A, Slatery M, Stamatoyannopoulos JA, Tolstorukov MY, White KP, Xi S,

- 647 Farnham PJ, Lieb JD, Wold BJ, Snyder M. 2012. ChIP-seq guidelines and practices  
648 of the ENCODE and modENCODE consortia. *Genome Res* 22:1813-31.
- 649 60. Kharchenko PV, Tolstorukov MY, Park PJ. 2008. Design and analysis of ChIP-seq  
650 experiments for DNA-binding proteins. *Nat Biotechnol* 26:1351-9.
- 651 61. Zhang Y, Liu T, Meyer CA, Eeckhoute J, Johnson DS, Bernstein BE, Nusbaum C,  
652 Myers RM, Brown M, Li W, Liu XS. 2008. Model-based analysis of ChIP-Seq (MACS).  
653 *Genome Biol* 9:R137.
- 654 62. Machanick P, Bailey TL. 2011. MEME-ChIP: motif analysis of large DNA datasets.  
655 *Bioinformatics* 27:1696-7.
- 656 63. Arnaud MB, Chibucos MC, Costanzo MC, Crabtree J, Inglis DO, Lotia A, Orvis J,  
657 Shah P, Skrzypek MS, Binkley G, Miyasato SR, Wortman JR, Sherlock G. 2010. The  
658 *Aspergillus* Genome Database, a curated comparative genomics resource for gene,  
659 protein and sequence information for the *Aspergillus* research community. *Nucleic  
660 Acids Res* 38:D420-7.
- 661 64. Stajich JE, Harris T, Brunk BP, Brestelli J, Fischer S, Harb OS, Kissinger JC, Li W,  
662 Nayak V, Pinney DF, Stoeckert CJ, Jr., Roos DS. 2012. FungiDB: an integrated  
663 functional genomics database for fungi. *Nucleic Acids Res* 40:D675-81.
- 664 65. Ge SX, Jung D, Yao R. 2019. ShinyGO: a graphical enrichment tool for animals and  
665 plants. *Bioinformatics* doi:10.1093/bioinformatics/btz931.
- 666 66. Wang PM, Choera T, Wiemann P, Pisithkul T, Amador-Noguez D, Keller NP. 2016.  
667 TrpE feedback mutants reveal roadblocks and conduits toward increasing secondary  
668 metabolism in *Aspergillus fumigatus*. *Fungal Genet Biol* 89:102-113.
- 669 67. Ostrem Loss EM, Lee MK, Wu MY, Martien J, Chen W, Amador-Noguez D, Jefcoate  
670 C, Remucal C, Jung S, Kim SC, Yu JH. 2019. Cytochrome P450 Monooxygenase-  
671 Mediated Metabolic Utilization of Benzo[a]Pyrene by *Aspergillus* Species. *mBio* 10.
- 672 68. Adressa DA, Stalheim KJ, Proteau PJ, Loesgen S. 2017. Unexpected  
673 Biotransformation of the HDAC Inhibitor Vorinostat Yields Aniline-Containing Fungal

- 674 Metabolites. ACS Chem Biol 12:1842-1847.
- 675 69. Adpressa DA, Connolly LR, Konkel ZM, Neuhaus GF, Chang XL, Pierce BR, Smith  
676 KM, Freitag M, Loesgen S. 2019. A metabolomics-guided approach to discover  
677 *Fusarium graminearum* metabolites after removal of a repressive histone  
678 modification. Fungal Genet Biol 132:103256.
- 679 70. Pluskal T, Castillo S, Villar-Briones A, Oresic M. 2010. MZmine 2: modular framework  
680 for processing, visualizing, and analyzing mass spectrometry-based molecular profile  
681 data. BMC Bioinformatics 11:395.
- 682 71. Abdelmohsen UR, Cheng C, Viegelmann C, Zhang T, Grkovic T, Ahmed S, Quinn RJ,  
683 Hentschel U, Edrada-Ebel R. 2014. Dereplication strategies for targeted isolation of  
684 new antitrypanosomal actinosporins A and B from a marine sponge associated-  
685 *Actinokineospora* sp. EG49. Mar Drugs 12:1220-44.
- 686 72. Xia J, Sinelnikov IV, Han B, Wishart DS. 2015. MetaboAnalyst 3.0--making  
687 metabolomics more meaningful. Nucleic Acids Res 43:W251-7.
- 688
- 689
- 690
- 691

## 692 **Figure Legends**

693 **Figure 1. Genome-wide analyses of the genes differentially affected by VosA, VelB,**  
694 **and WetA in *A. nidulans* conidia. (A)** Venn diagram showing the genes whose mRNA  
695 levels are down-regulated (left) or up-regulated (right) by the absence of VosA, VelB, or  
696 WetA in conidia. **(B)** Gene Ontology (GO) term enrichment analysis of down-regulated (left)  
697 or up-regulated (right) genes the  $\Delta vosA$ ,  $\Delta velB$ , and  $\Delta wetA$  conidia.

698 **Figure 2. Identification of VosA, VelB, and WetA direct targets in *A. nidulans* conidia.**  
699 **(A)** Venn diagram showing the number of the VosA, VelB, and WetA peak-associated genes  
700 in conidia. Motifs identified in peak-associated genes are shown next to the labels. **(B)**  
701 Summary of potential VosA, VelB, and WetA direct target DEGs in *A. nidulans* conidia.

702 **Figure 3. Regulatory effects of VosA, VelB, and WetA on trehalose, chitin, and  $\beta$ -1,3-**  
703 **glucan biosynthesis in *A. nidulans* conidia. (A)** The amount of conidial trehalose in *A.*  
704 *nidulans*. **(B-D)** Levels of mRNA of the genes associated with trehalose levels (B), chitin  
705 biosynthesis (C), and  $\beta$ -1,3-glucan biosynthesis (D) in the  $\Delta vosA$ ,  $\Delta velB$ , and  $\Delta wetA$  conidia.

706 **Figure 4. The roles of VosA, VelB, and WetA in primary metabolism of *A. nidulans***  
707 **conidia.** Maps of primary metabolites involved in the TCA cycle and amino acid  
708 biosynthesis in WT,  $\Delta vosA$ ,  $\Delta velB$ , and  $\Delta wetA$  conidia. Levels of identified primary  
709 metabolites produced in the WT and null mutant conidia.

710 **Figure 5. Levels of secondary metabolites in the  $\Delta vosA$ ,  $\Delta velB$ , and  $\Delta wetA$  conidia.**  
711 Differentially regulated secondary metabolites in WT,  $\Delta vosA$ ,  $\Delta velB$ , and  $\Delta wetA$  conidia. The  
712 heatmap is color-coded and represents high abundance (red) or low abundance (blue) of  
713 ions/retention time pairs detected by LC/MS analysis.

714 **Figure 6. The regulation of key secondary metabolites in  $\Delta vosA$ ,  $\Delta veIB$ , and  $\Delta wetA$**   
715 **conidia of *A. nidulans*.** (A) *Top panel:* The chemical structures of the compounds. *Middle*  
716 *panel:* The abundance of norsolorinic acid, nidurufin, versiconol, and sterigmatocystin in WT,  
717  $\Delta vosA$ ,  $\Delta veIB$ , and  $\Delta wetA$  conidia. *Bottom panel:* The sterigmatocystin gene cluster and  
718 differentially expressed genes involved in sterigmatocystin biosynthesis in  $\Delta vosA$ ,  $\Delta veIB$ ,  
719 and  $\Delta wetA$  conidia. (B) *Top panel:* The abundance of emericellamide in WT,  $\Delta vosA$ ,  $\Delta veIB$ ,  
720 and  $\Delta wetA$  conidia with the emericellamide A structure. *Bottom panel:* The emericellamide  
721 gene cluster and mRNA expression of genes associated with emericellamide biosynthesis  
722 in  $\Delta vosA$ ,  $\Delta veIB$ , and  $\Delta wetA$  conidia. (C) *Left panel:* The abundance of austinol and  
723 dehydroaustinol in WT,  $\Delta vosA$ ,  $\Delta veIB$ , and  $\Delta wetA$  conidia with their structures. *Right panel:*  
724 The austinol gene cluster and mRNA expression of genes associated with austinol  
725 biosynthesis in  $\Delta vosA$ ,  $\Delta veIB$ , and  $\Delta wetA$  conidia.

726 **Figure 7. Proposed gene regulatory network of VosA, VeIB, and WetA in conidia.** The  
727 network represents the interactions between VosA/VeIB/WetA and their target genes. Gene  
728 names in bold typeface are direct target genes of all three TFs. Gene names in red or blue  
729 are induced or repressed genes by VosA, VeIB, and/or WetA, respectively, in conidia.

730

731

732 **Table 1 *Aspergillus* strains used in this study**

| <b>Strain name</b> | <b>Relevant genotype</b>                                                                                                                  | <b>References</b> |
|--------------------|-------------------------------------------------------------------------------------------------------------------------------------------|-------------------|
| FGSC4              | <i>A. nidulans</i> wild type, <i>veA</i> <sup>+</sup>                                                                                     | FGSC <sup>a</sup> |
| THS15              | <i>pyrG89; pyroA4; ΔvosA::AfupyrG</i> <sup>+</sup> ; <i>veA</i> <sup>+</sup>                                                              | (27)              |
| THS16              | <i>pyrG89; pyroA4; ΔvelB::AfupyrG</i> <sup>+</sup> ; <i>veA</i> <sup>+</sup>                                                              | (27)              |
| THS20.1            | <i>pyrG89; pyroA::velB(p)::velB::FLAG<sub>3x</sub>::pyroA</i> <sup>b</sup> ; <i>ΔvelB::AfupyrG</i> <sup>+</sup> ; <i>veA</i> <sup>+</sup> | (27)              |
| THS28.1            | <i>pyrG89; pyroA::vosA(p)::vosA::FLAG<sub>3x</sub>::pyroA</i> <sup>b</sup> ; <i>ΔvosA::AfupyrG</i> <sup>+</sup> ; <i>veA</i> <sup>+</sup> | (27)              |
| TMY4               | <i>pyrG89; pyroA4; ΔwetA::AfupyrG</i> <sup>+</sup> ; <i>veA</i> <sup>+</sup>                                                              | (25)              |

733 <sup>a</sup> Fungal Genetic Stock Center

734 <sup>b</sup> The 3/4 *pyroA* marker causes the targeted integration at the *pyroA* locus.

735



736 **Supplemental Materials**

737 **Table S1.** DEGs related to asexual development in the null mutants' conidia.

738 **Table S2.** DEGs related to signal transduction in the null mutants' conidia.

739 **Table S3.** VosA, VelB, and WetA peak-associated DEGs.

740 **Table S4.** Sixty-six DEGs associated with VosA, VelB, and WetA peaks.

741 **Table S5.** DEGs involved in conidial-wall integrity in the null mutants' conidia.

742 **Table S6.** DEGs involved in amino acid metabolism in the null mutants' conidia.

743 **Table S7.** DEGs contained in the secondary metabolism gene clusters in the null mutants'  
744 conidia.

745 **Figure S1.** Summary of DEGs in the  $\Delta vosA$ ,  $\Delta velB$ , and  $\Delta wetA$  conidia.

746 **Figure S2.** Gene Ontology (GO) term enrichment analysis of DEGs in the  $\Delta vosA$ ,  
747  $\Delta velB$ , and  $\Delta wetA$  conidia. (A) The top enriched functional categories of the biological  
748 process GO terms of DEG in both  $\Delta vosA$  and  $\Delta velB$  conidia (A), or in  $\Delta wetA$  conidia (B).

749 **Figure S3.** Principle component analysis of the metabolic differences between the  
750 conidia metabolites from WT,  $\Delta vosA$ ,  $\Delta velB$ , and  $\Delta wetA$  strains.

751

752

753

A

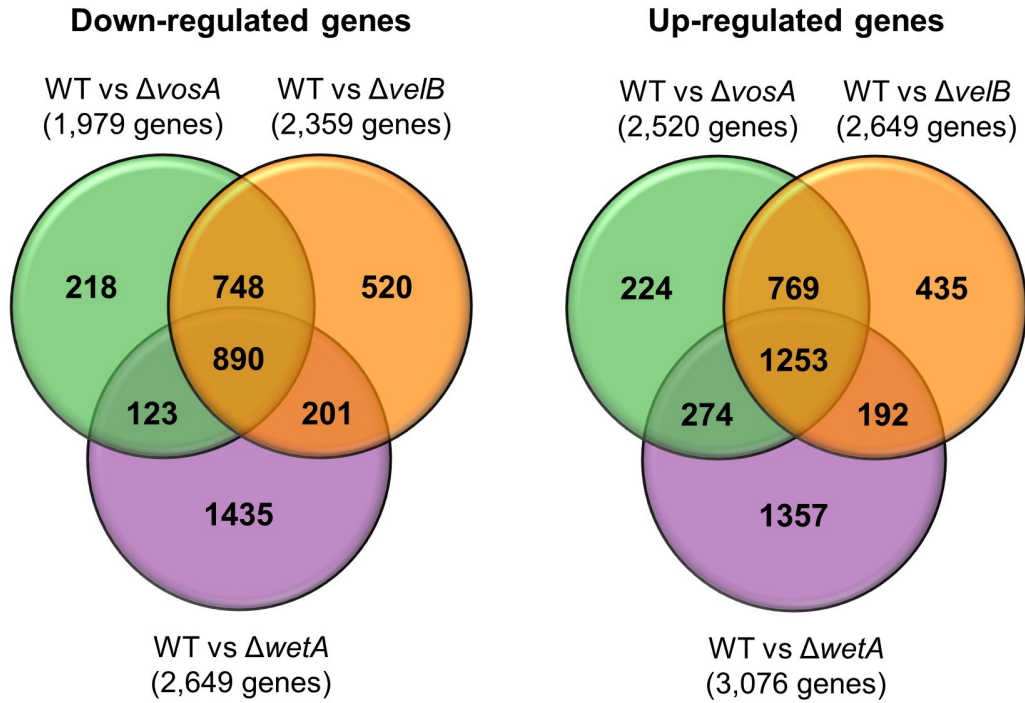

B

$\Delta vosA$  &  $\Delta velB$  &  $\Delta wetA$  Biological Process

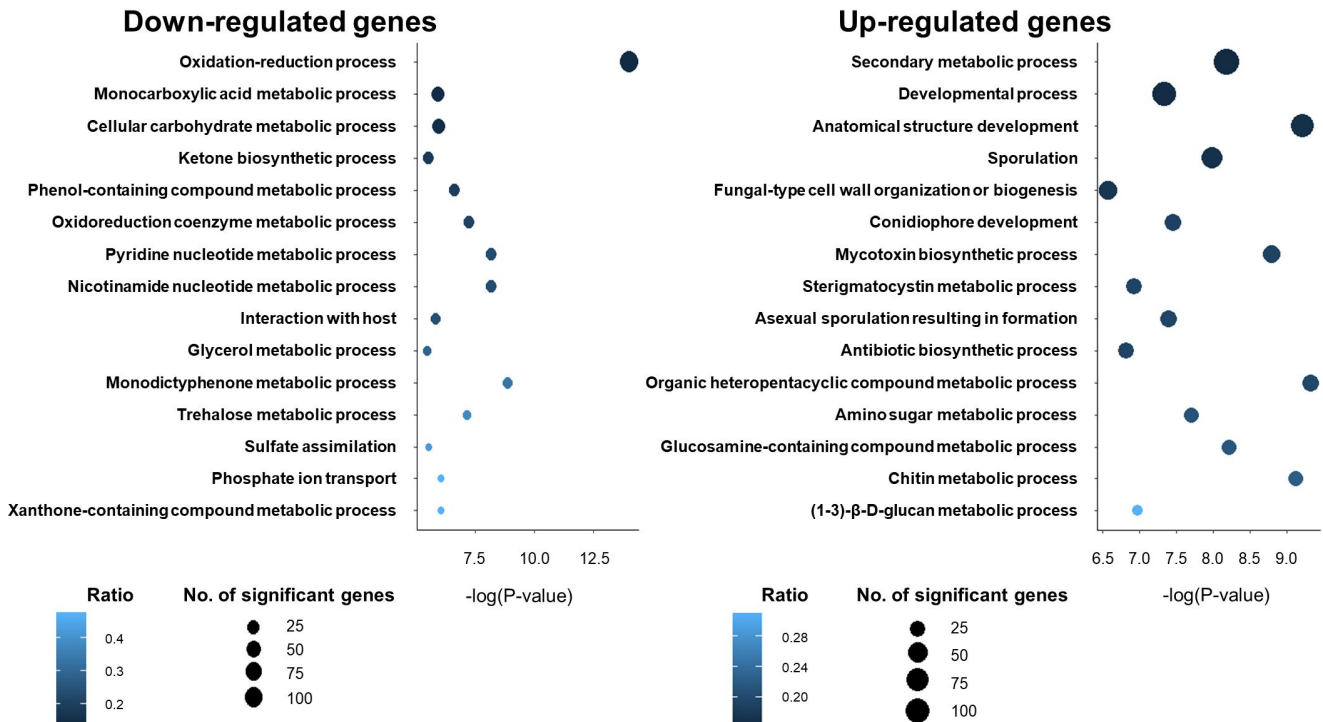

A

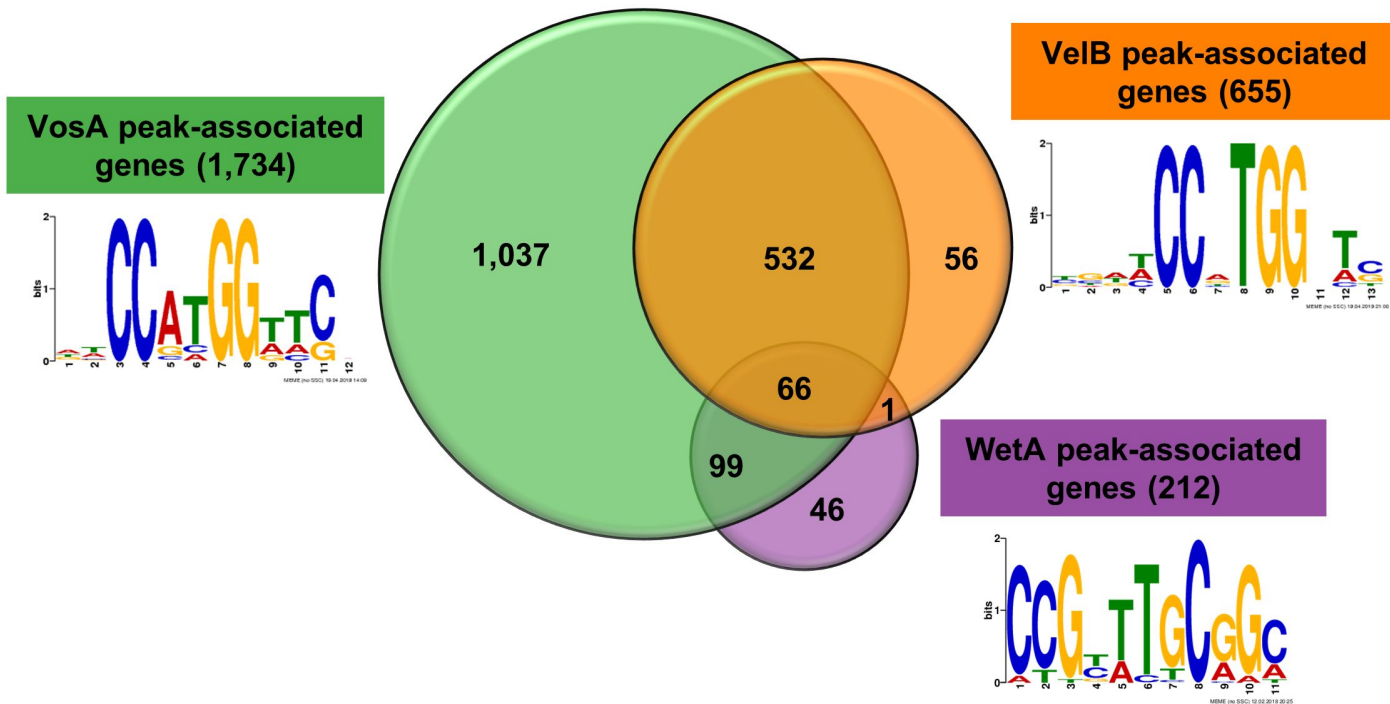

B

| Gene ID                     | logFC         |               |               | Gene name   | Gene description                                          |
|-----------------------------|---------------|---------------|---------------|-------------|-----------------------------------------------------------|
|                             | $\Delta wetA$ | $\Delta vosA$ | $\Delta veIB$ |             |                                                           |
| <b>Up-regulated genes</b>   |               |               |               |             |                                                           |
| AN5893                      | 4.08          | 2.96          | 2.02          | <i>flbA</i> | RGS (regulator of G-protein signaling) family member      |
| AN2385                      | 1.15          | 5.03          | 3.76          | <i>xgeA</i> | GPI anchored endo-1,3(4)-beta-glucanase                   |
| AN1058                      | 5.20          | 4.26          | 3.87          |             | SCP-like extracellular protein                            |
| AN2989                      | 3.89          | 4.26          | 3.85          |             | Glycine-rich RNA-binding protein                          |
| AN3674                      | 6.71          | 4.19          | 4.14          |             | PH domain protein                                         |
| AN0378                      | 3.82          | 1.29          | 1.33          |             | Hypothetical protein                                      |
| AN5756                      | 2.90          | 3.48          | 3.14          |             | Hypothetical protein                                      |
| AN7101                      | 2.70          | 2.04          | 1.83          |             | Hypothetical protein                                      |
| AN10458                     | 5.25          | 2.03          | 2.09          |             | Hypothetical protein                                      |
| <b>Down-regulated genes</b> |               |               |               |             |                                                           |
| AN8643                      | -4.62         | -3.99         | -3.35         | <i>atfB</i> | bZIP transcription factor                                 |
| AN5523                      | -1.62         | -1.65         | -2.37         | <i>tpsA</i> | Alpha,alpha-trehalose-phosphate synthase                  |
| AN5709                      | -6.86         | -1.67         | -3.72         | <i>vadA</i> | Hypothetical protein                                      |
| AN3079                      | -10.47        | -2.23         | -2.47         | <i>cetA</i> | Extracellular thaumatin domain protein                    |
| AN3361                      | -1.16         | -1.80         | -2.46         | <i>nopA</i> | G-protein coupled receptor-like protein                   |
| AN0129                      | -2.29         | -1.01         | -2.87         | <i>ppsA</i> | Putative tyrosine phosphatase                             |
| AN2466                      | -2.36         | -1.31         | -2.04         |             | MFS glucose transporter, putative                         |
| AN11917                     | -9.45         | -1.89         | -3.31         |             | Has domain(s) with predicted O-methyltransferase activity |
| AN6403                      | -11.38        | -2.62         | -4.60         |             | Hypothetical protein                                      |
| AN7102                      | -6.96         | -7.23         | -6.48         |             | Hypothetical protein                                      |
| AN10040                     | -10.80        | -9.74         | -10.97        |             | Hypothetical protein                                      |

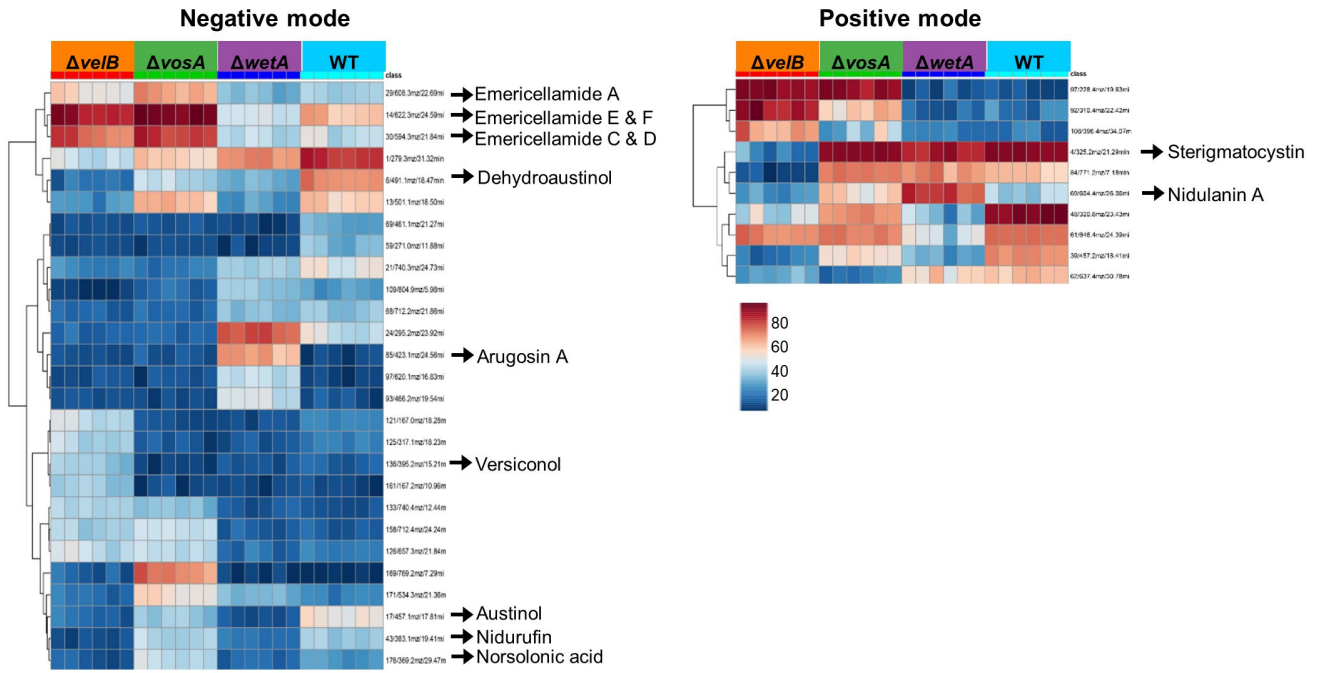

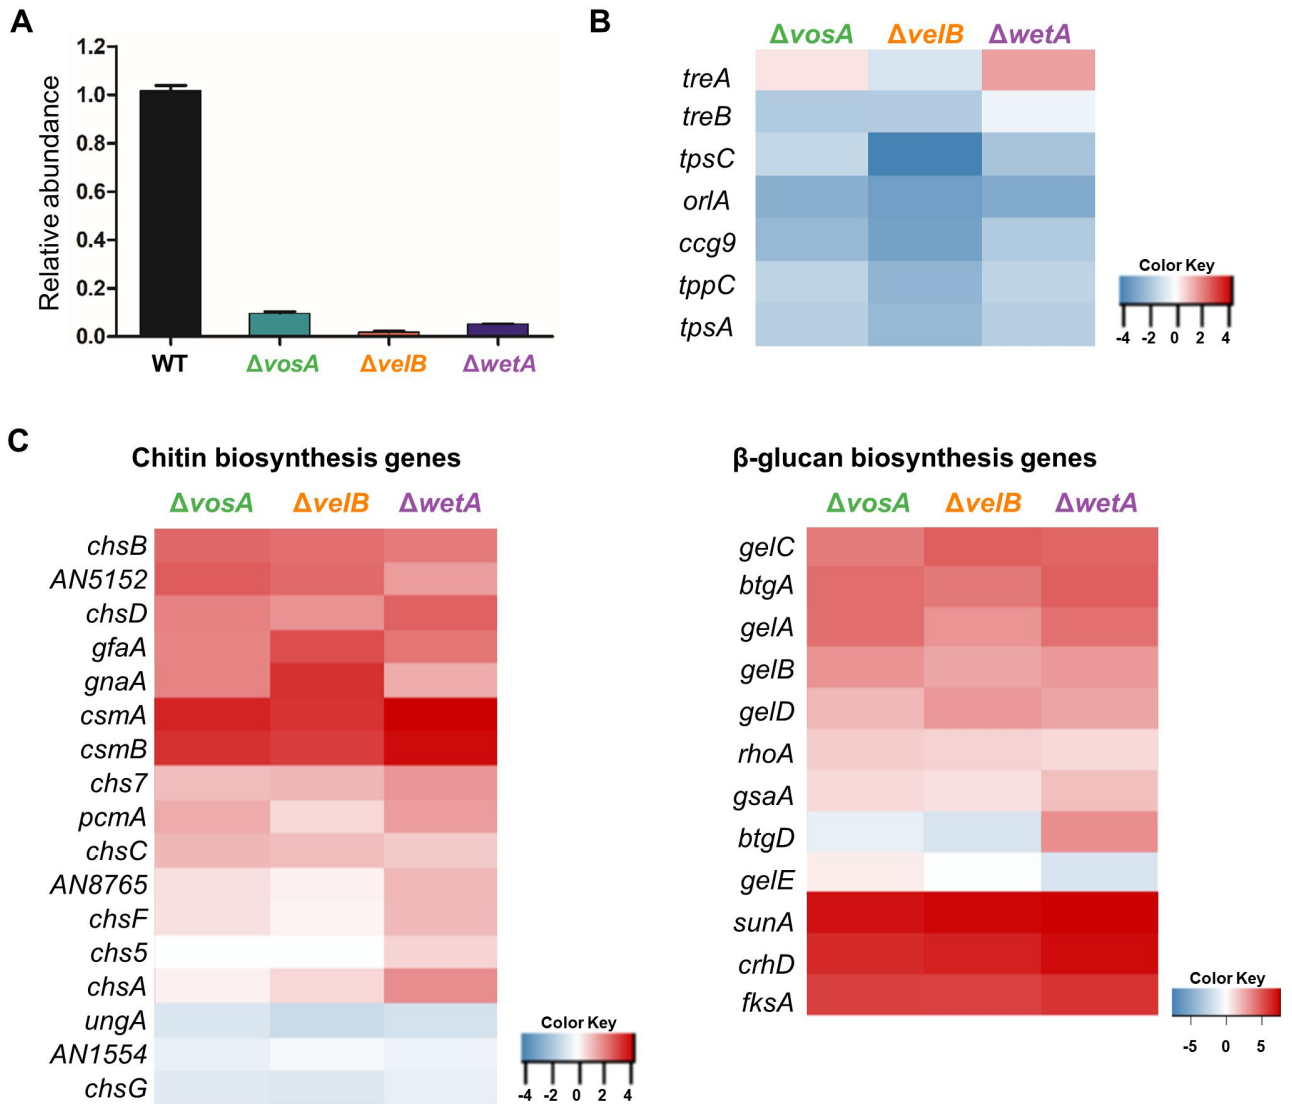

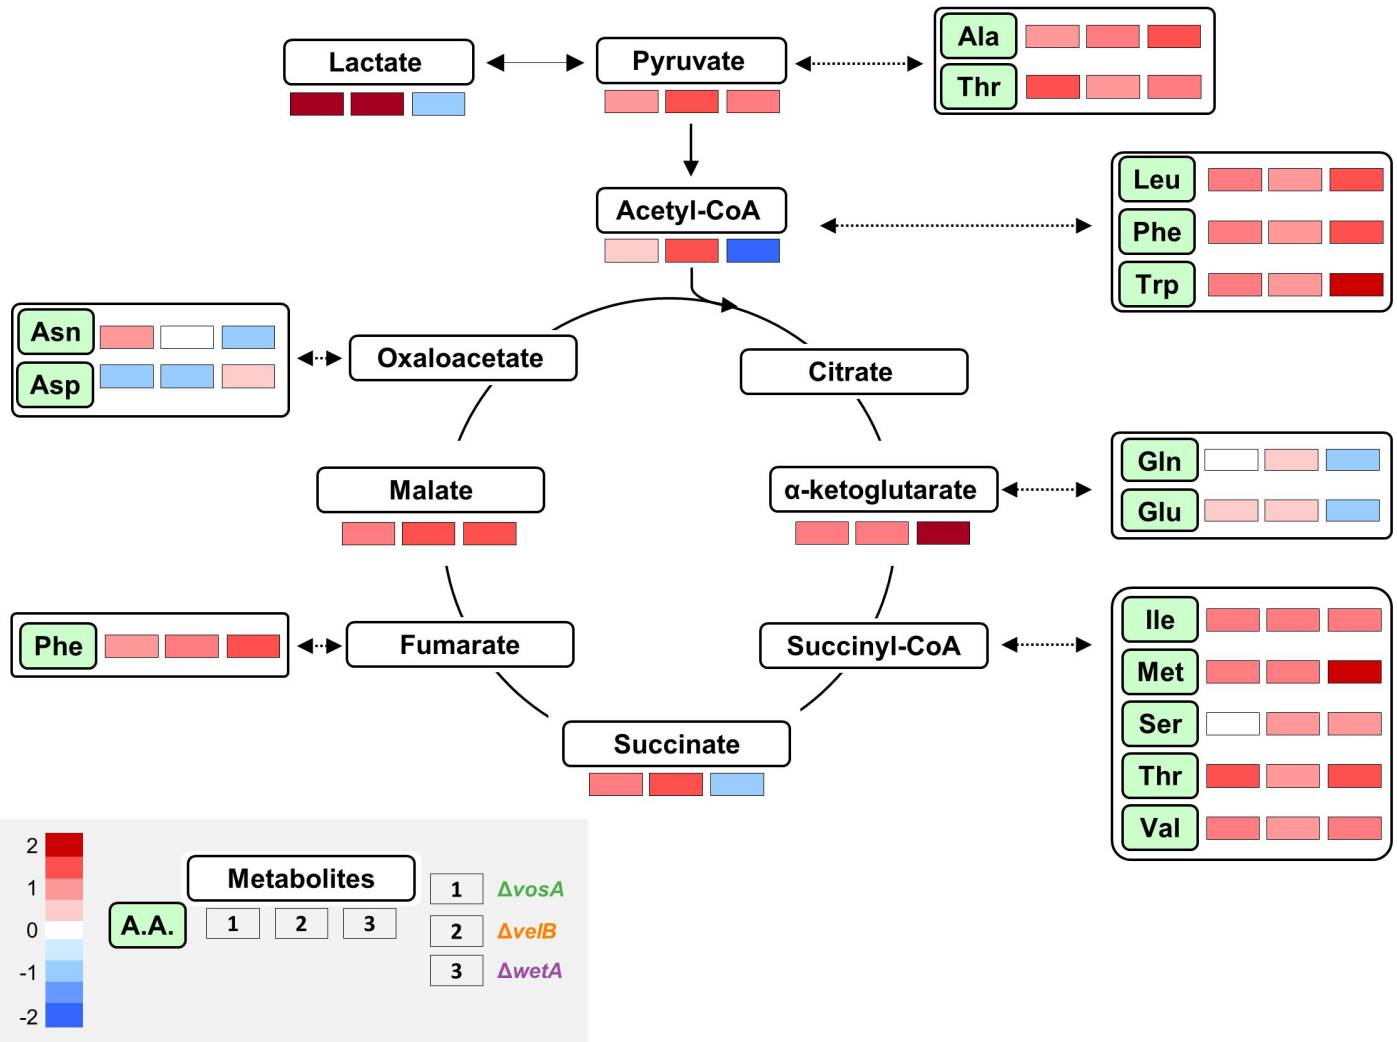

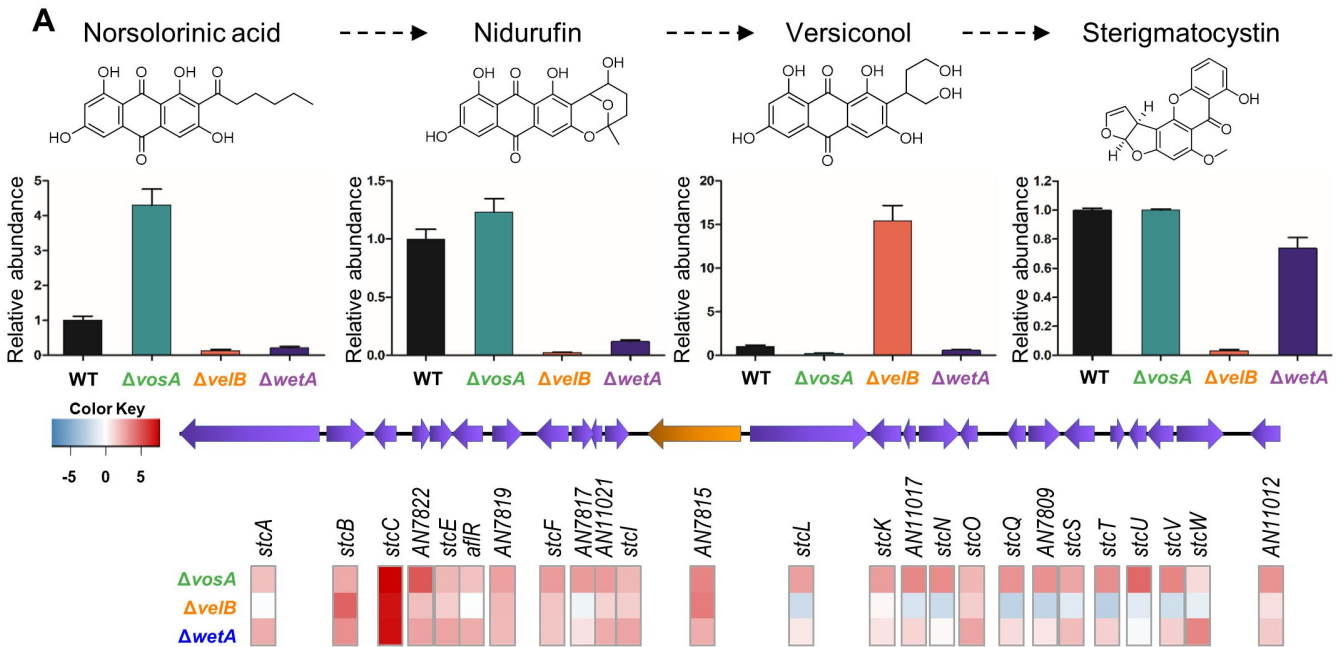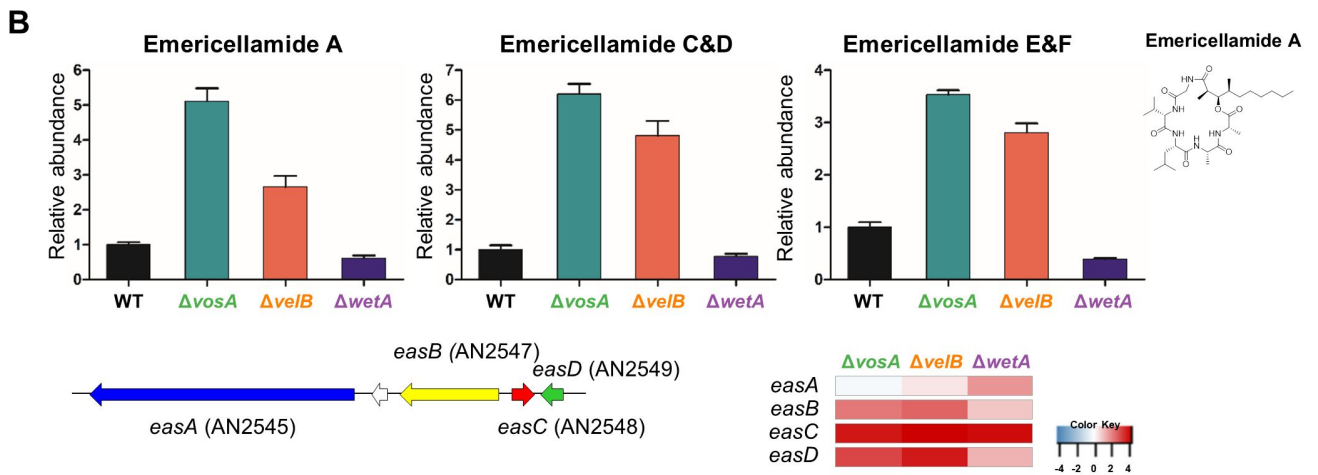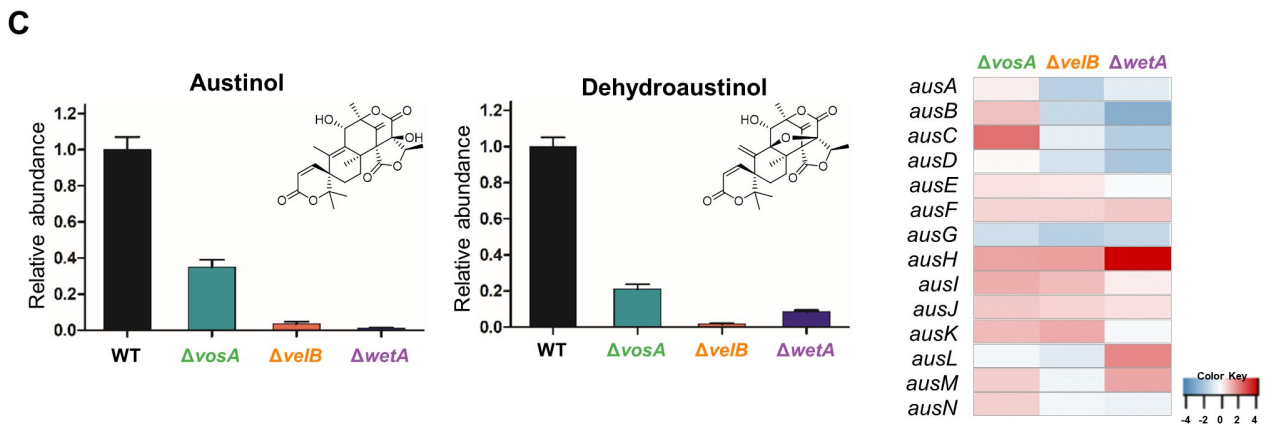

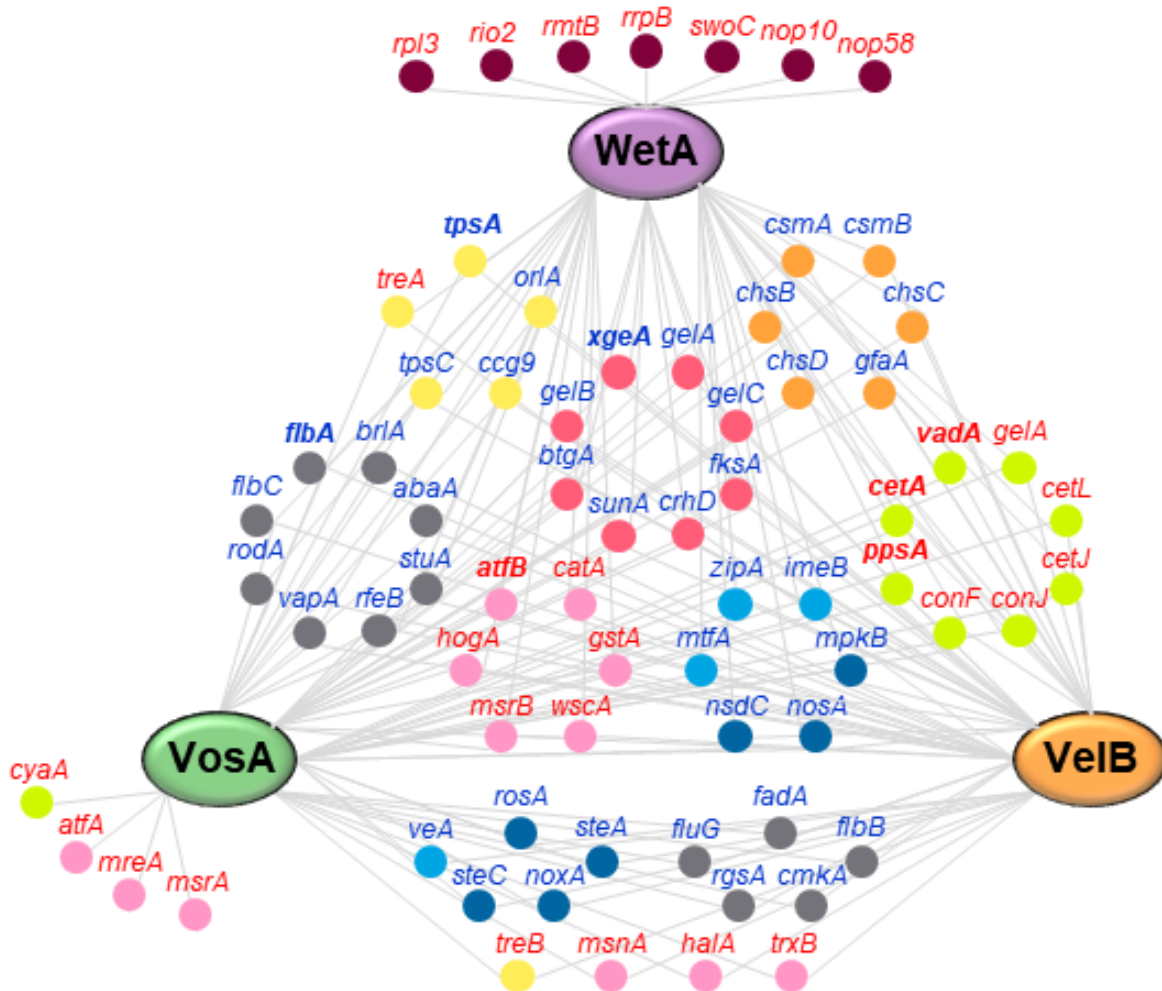

- |                                                                |                                                                |                                                          |
|----------------------------------------------------------------|----------------------------------------------------------------|----------------------------------------------------------|
| <span style="color: red;">●</span> $\beta$ glucan biosynthesis | <span style="color: orange;">●</span> Chitin biosynthesis      | <span style="color: pink;">●</span> Stress tolerance     |
| <span style="color: yellow;">●</span> Trehalose biosynthesis   | <span style="color: lightgreen;">●</span> Conidial germination | <span style="color: blue;">●</span> Secondary metabolism |
| <span style="color: darkblue;">●</span> Sexual development     | <span style="color: grey;">●</span> Asexual development        | <span style="color: darkpurple;">●</span> RNA processing |
